# Supplementary material
Source: ML conference proceedings conference paper supplement (https://proceedings.neurips.cc/paper_files/paper/2020/hash/5227fa9a19dce7ba113f50a405dcaf09-Abstract.html)
Supplement: Supplementary file [file 5227fa9a19dce7ba113f50a405dcaf09-Supplemental.zip]

## BACKGROUND & SETTING

### 1. Abstract

In this paper, we estimate and analyze the **Lipschitz constant of neural networks**, key metric for safe and robust deep learning. First, we show that even for two layer neural networks, **exact computation is NP-hard**.

Then, we provide **two Lipschitz upper bounds**: *AutoLip*, the first generic algorithm for upper bounding the Lipschitz constant of any automatically differentiable function, and *SeqLip*, an improved algorithm for MLPs.

Moreover, we provide an **AutoGrad compliant power method** algorithm, allowing efficient computations even on large convolutions. Our experiments show that *SeqLip* can significantly improve on the existing upper bounds.

### 2. Notations

1. A function  $f : \mathbb{R}^n \rightarrow \mathbb{R}^m$  is *Lipschitz continuous* if

$$\forall x, y \in \mathbb{R}^n, \|f(x) - f(y)\|_2 \leq L \|x - y\|_2.$$

The smallest such  $L$  is the *Lipschitz constant* of  $f$ , denoted  $L(f)$ .

2. A  $K$ -layer *Multi-Layer-Perceptron*  $f_{MLP} : \mathbb{R}^n \rightarrow \mathbb{R}^m$  is the function

$$f_{MLP}(x) = T_K \circ \rho_{K-1} \circ \dots \circ \rho_1 \circ T_1(x),$$

where  $T_k(x) = M_k x + b_k$  is affine and  $\rho_k(x) = (g_k(x_i))_{i \in [1, n_k]}$  non-linear.

### 3. Exact Lipschitz computation is NP-hard

Problem **LIP-CST**:

**Input:** Two matrices  $M_1 \in \mathbb{R}^{l \times n}$  and  $M_2 \in \mathbb{R}^{m \times l}$ , and a constant  $\ell \geq 0$ .

**Question:** Let  $f = M_2 \circ \rho \circ M_1$  where  $\rho(x) = \max\{0, x\}$  is the ReLU activation function.

Is the Lipschitz constant  $L(f) \leq \ell$ ?

**Theorem LIP-CST** is NP-hard.

Reduction to maximizing a convex quadratic function on the hypercube.

### 4. Lipschitz constant of affine layers

**Algorithm 1** AutoGrad compliant power method

**Input:** affine function  $f : \mathbb{R}^n \rightarrow \mathbb{R}^m$ , number of iteration  $N$

**Output:** approximation of the Lipschitz constant  $L(f)$

- 1: **for**  $k = 1$  to  $N$  **do**
- 2:  $v \leftarrow \nabla g(v)$  where  $g(x) = \frac{1}{2} \|f(x) - f(0)\|_2^2$
- 3:  $\lambda \leftarrow \|v\|_2$
- 4:  $v \leftarrow v/\lambda$
- 5: **end for**
- 6: **return**  $L(f) = \|f(v) - f(0)\|_2$

**Other layers** Most common other layers in neural networks including activation functions, pooling, batch normalization have simple and explicit Lipschitz constants.

## UPPER BOUNDS

### 5. AutoLip

For sequential networks, this upper bounds is simply the product of spectral norms. Otherwise, we propagate the Lipschitz upper bound with Alg. 2.

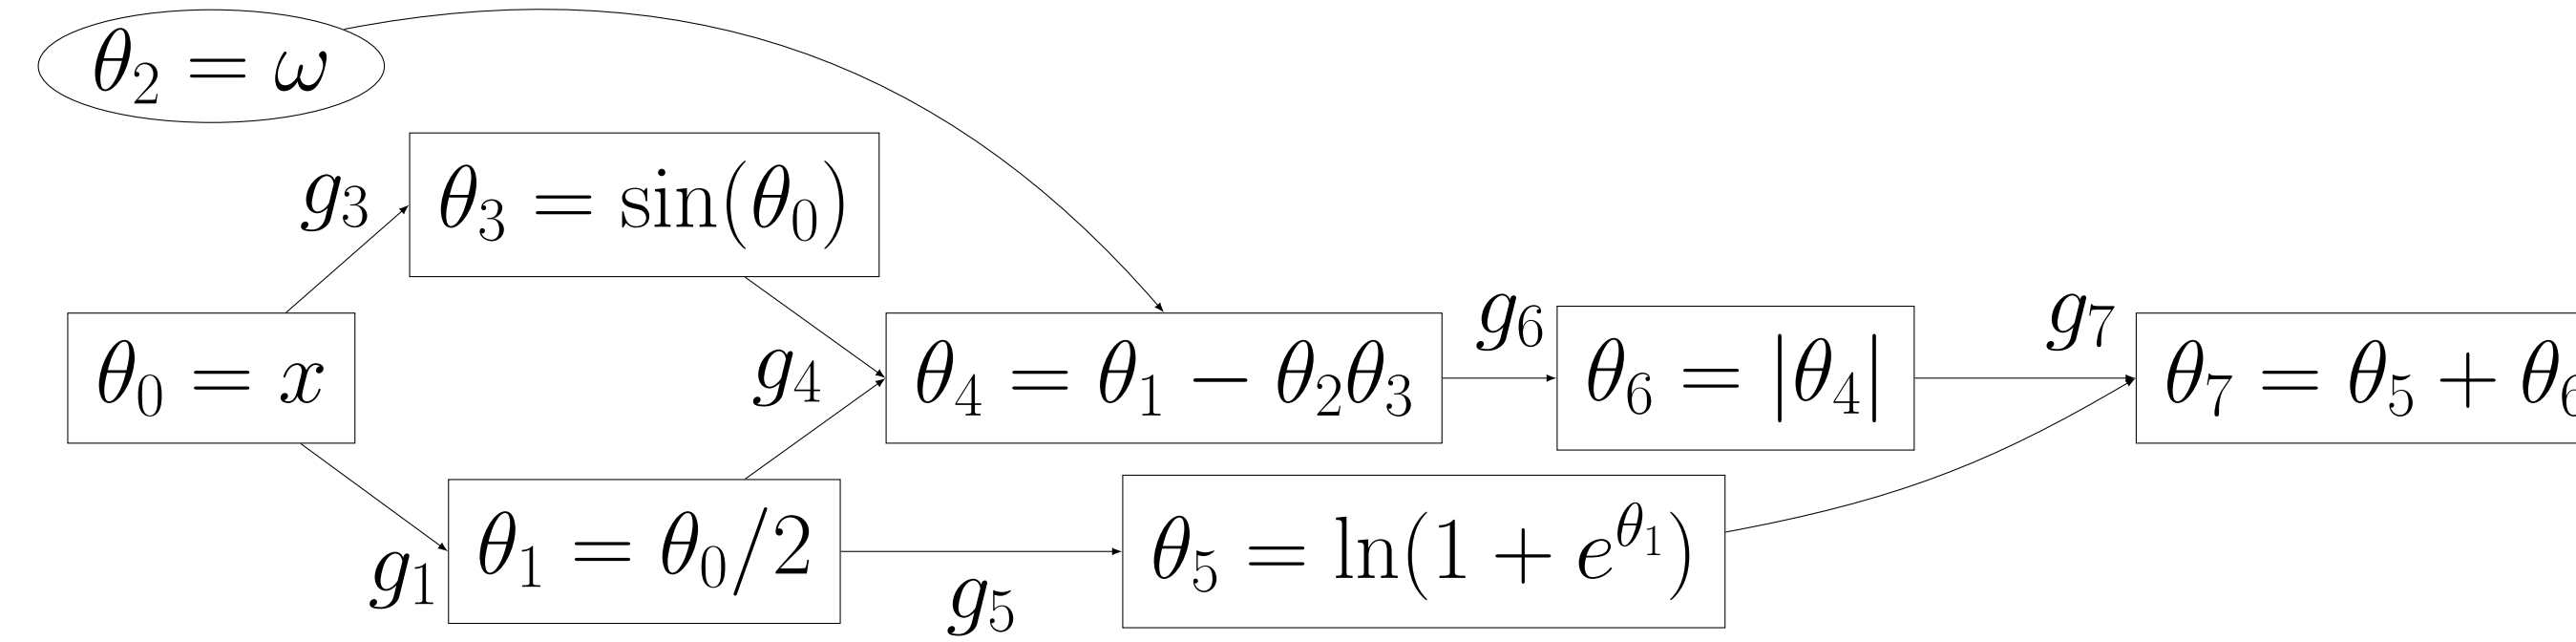

Figure: Example of a computation graph for  $f_\omega(x) = \ln(1 + e^{x/2}) + |x/2 - \omega \sin(x)|$

#### Algorithm 2 AutoLip

**Input:** function  $f : \mathbb{R}^n \rightarrow \mathbb{R}^m$  and its computation graph  $(g_1, \dots, g_K)$

**Output:** upper bound on the Lipschitz constant:  $\hat{L}_{AL} \geq L(f)$

- 1:  $\mathcal{Z} = \{(z_0, \dots, z_K) : \forall k \in [0, K], \theta_k \text{ is constant} \Rightarrow z_k = \theta_k(0)\}$
- 2:  $L_0 \leftarrow 1$
- 3: **for**  $k = 1$  to  $K$  **do**
- 4:  $L_k \leftarrow \sum_{i=1}^{k-1} \max_{z \in \mathcal{Z}} \|\partial_i g_k(z)\|_2 L_i$
- 5: **end for**
- 6: **return**  $\hat{L}_{AL} = L_k$

### 6. SeqLip

**Idea:** Exploit the relationships between singular vectors of consecutive layers.

$$\begin{aligned} L(f_{MLP}) &\leq \max_{\forall i, \sigma_i \in [0, 1]^{n_i}} \|M_K \text{diag}(\sigma_{K-1}) \dots \text{diag}(\sigma_1) M_1\|_2, \\ &\leq \max_{\forall i, \sigma_i \in [0, 1]^{n_i}} \|\Sigma_K V_K^\top \text{diag}(\sigma_K) U_{K-1} \Sigma_{K-1} V_{K-1}^\top \text{diag}(\sigma_{K-1}) \dots\|_2 \\ &\leq \hat{L}_{SL} = \prod_{i=1}^{K-1} \max_{\sigma_i \in [0, 1]^{n_i}} \left\| \tilde{\Sigma}_{i+1} V_{i+1}^\top \text{diag}(\sigma_{i+1}) U_i \tilde{\Sigma}_i \right\|_2 \end{aligned}$$

where  $M_i = U_i \Sigma_i V_i^\top$ ,  $\tilde{\Sigma}_i = \Sigma_i$  if  $i \in \{1, K\}$  and  $\tilde{\Sigma}_i = \Sigma_i^{1/2}$  otherwise.

**Theorem** Let  $M_k$  be the matrix associated to the  $k$ -th linear layer,  $u_k$  (resp.  $v_k$ ) its first left (resp. right) singular vector, and  $r_k = s_{k,2}/s_{k,1}$  the ratio between its second and first singular values. Then we have

$$\hat{L}_{SL} \leq \hat{L}_{AL} \prod_{k=1}^{K-1} \sqrt{(1 - r_k - r_{k+1}) \max_{\sigma \in [0, 1]^{n_k}} \langle \sigma \cdot v_{k+1}, u_k \rangle^2 + r_k + r_{k+1} + r_k r_{k+1}}.$$

If the ratios  $r_k$  are negligible, then

$$\hat{L}_{SL} \leq \hat{L}_{AL} \prod_{k=1}^{K-1} \max_{\sigma \in [0, 1]^{n_k}} |\langle \sigma \cdot v_{k+1}, u_k \rangle| \quad \text{and} \quad \hat{L}_{SL} \approx \frac{\hat{L}_{AL}}{\pi^{K-1}}.$$

## EXPERIMENTS

### 7. Experiments

#### Theoretical setting

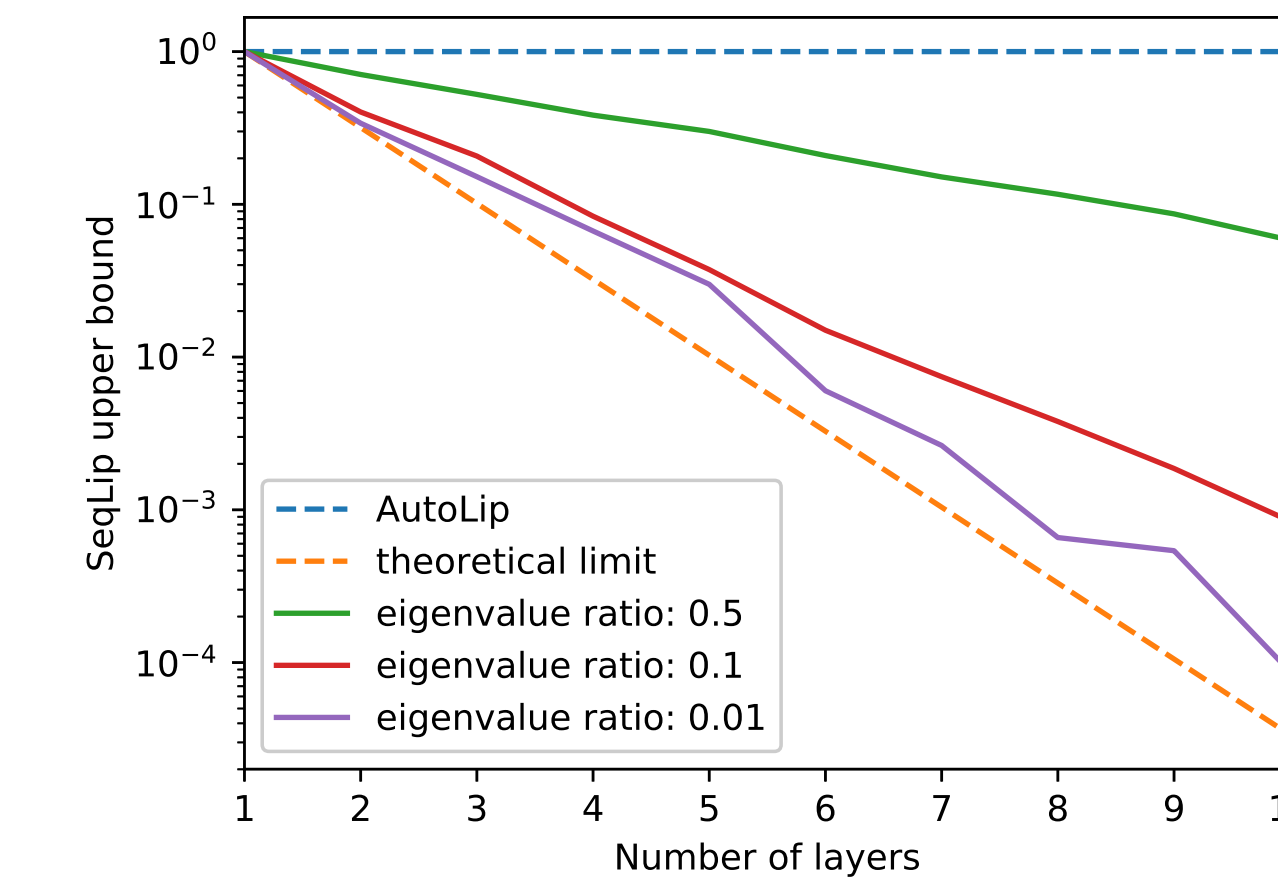

Figure: SeqLip in the ideal scenario

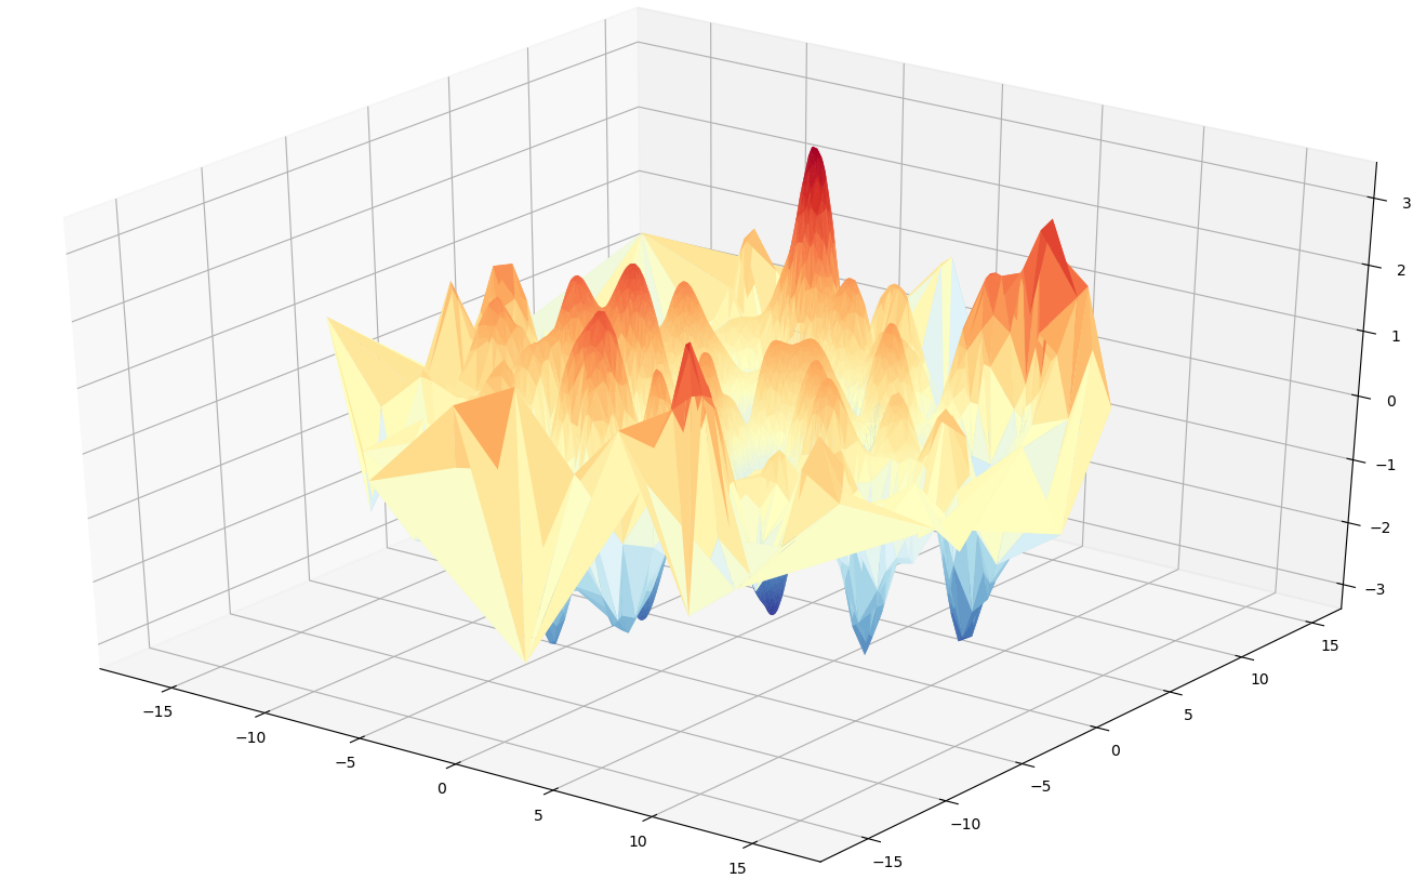

Figure: Synthetic function to train MLPs

#### MLP

| # layers | Upper bounds |         |         |           | Lower bounds |           |             |
|----------|--------------|---------|---------|-----------|--------------|-----------|-------------|
|          | Frob.        | AutoLip | SeqLip  | Greedy SL | Data         | Annealing | Grid Search |
| 4        | 648.2        | 33.04   | 21.47   | 21.47     | 4.36         | 4.55      | 6.56        |
| 5        | 4283.1       | 134.4   | 72.87   | 72.87     | 6.77         | 5.8       | 7.1         |
| 7        | 22341        | 294.6   | 130.2   | 130.2     | 5.4          | 5.27      | 6.51        |
| 10       | 7343800      | 19248.2 | 2463.44 | 2463.36   | 10.04        | 5.77      | 17.1        |

Figure: AutoLip and SeqLip for MLPs of various size

#### CNN

| # layers | Upper bounds     |                  |              | Lower bounds |           |
|----------|------------------|------------------|--------------|--------------|-----------|
|          | AutoLip          | Greedy           | SeqLip Ratio | Dataset      | Annealing |
| 4        | 174              | 86               | 2            | 12.64        | 25.5      |
| 5        | 790.1            | 335              | 2.4          | 16.79        | 22.2      |
| 7        | 12141            | 3629             | 3.3          | 31.22        | 43.6      |
| 10       | $4.5 \cdot 10^6$ | $8.2 \cdot 10^5$ | 5.4          | 38.26        | 107.8     |

Figure: AutoLip and SeqLip for MNIST-CNNs of various size

#### AlexNet

$$\frac{\text{AutoLip}}{3.62 \times 10^7} \quad \frac{\text{Greedy SeqLip}}{5.45 \times 10^6}$$

Figure: AutoLip and SeqLip for AlexNet

### 8. Conclusion and perspectives

SeqLip can improve by a **large factor** the upper-bound given by AutoLip (up to a **factor 8** in real scenarios). However, these bounds remain **very large for vision networks**, and it is yet an open question to know how close these bounds are to the **real Lipschitz constant**.
